# Supplementary material for: Targeting the Synthetic Vulnerability of PTEN -Deficient Glioblastoma Cells with MCL1 Inhibitors
Source: Oxford University Press journal article supplement (doi:10.1158/1535-7163.mct-20-0099), 2020-07-31
Supplement: 15357163mct200099-sup-237160_2_supp_6400668_qcv88w.pdf [file 15357163mct200099-sup-237160_2_supp_6400668_qcv88w.pdf]

## Survival proportions of glioma patients

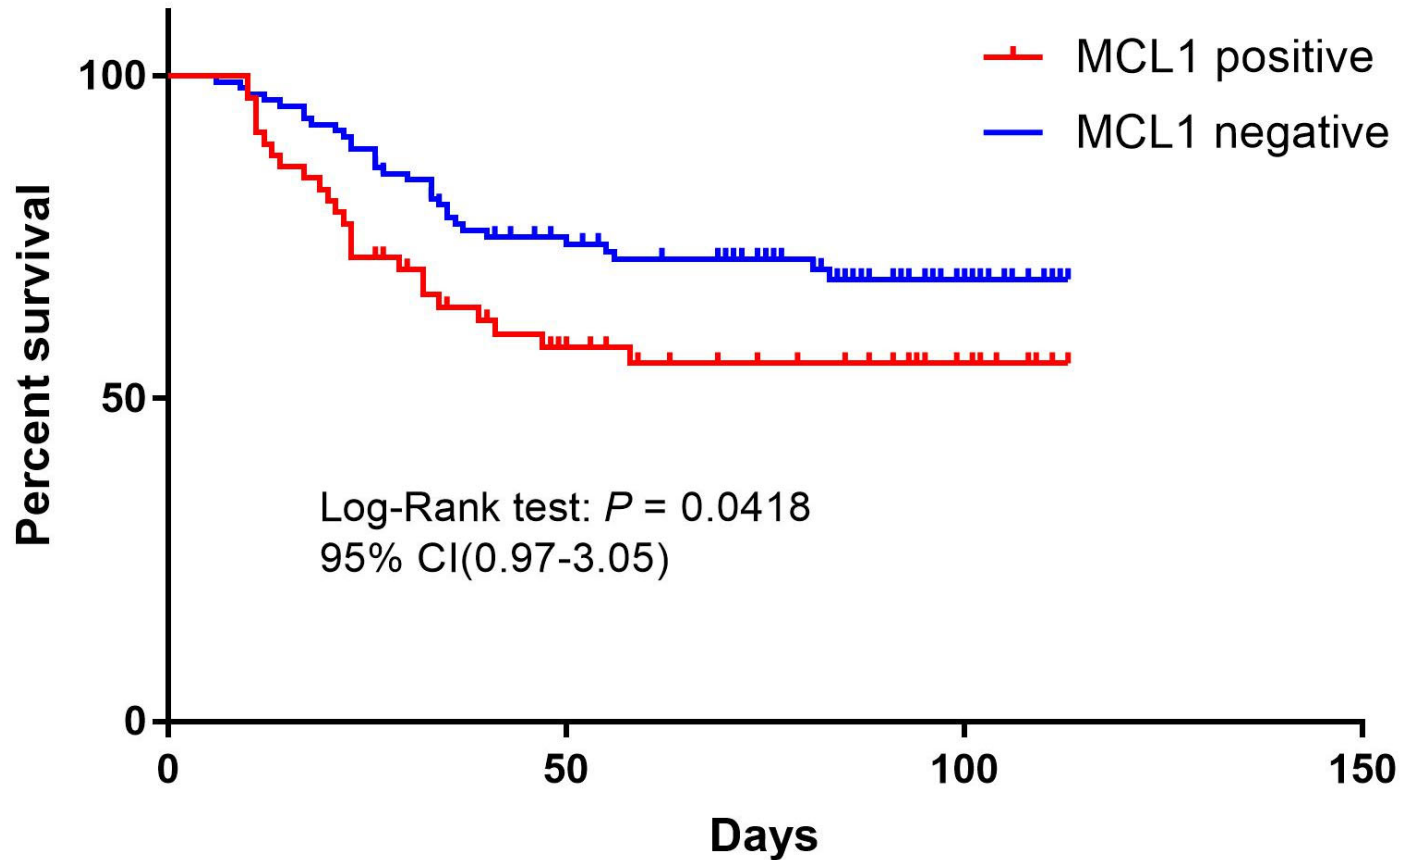

Supplemental Figure 1. Kaplan-Meier survival curves of glioma patients with positive or negative MCL1 expression ( $P$  value by log-rank test).

# Proteome Profiler™ Array

## Human Apoptosis Array Kit

A

| Coordinate | Target/Control    | Coordinate | Target/Control         |
|------------|-------------------|------------|------------------------|
| A1, A2     | Reference Spots   | C13, C14   | HO-2/HMOX2             |
| A23, A24   | Reference Spots   | C15, C16   | HSP27                  |
| B1, B2     | Bad               | C17, C18   | HSP60                  |
| B3, B4     | Bax               | C19, C20   | HSP70                  |
| B5, B6     | Bcl-2             | C21, C22   | HTRA2/Omi              |
| B7, B8     | Bcl-x             | C23, C24   | Livin                  |
| B9, B10    | Pro-Caspase-3     | D1, D2     | PON2                   |
| B11, B12   | Cleaved Caspase-3 | D3, D4     | p21/CIP1/CDKN1A        |
| B13, B14   | Catalase          | D5, D6     | p27/Kip1               |
| B15, B16   | cIAP-1            | D7, D8     | Phospho-p53 (S15)      |
| B17, B18   | cIAP-2            | D9, D10    | Phospho-p53 (S46)      |
| B19, B20   | Claspain          | D11, D12   | Phospho-p53 (S392)     |
| B21, B22   | Clusterin         | D13, D14   | Phospho-Rad17 (S635)   |
| B23, B24   | Cytochrome c      | D15, D16   | SMAC/Diablo            |
| C1, C2     | TRAIL R1/DR4      | D17, D18   | Survivin               |
| C3, C4     | TRAIL R2/DR5      | D19, D20   | TNF RI/TNFRSF1A        |
| C5, C6     | FADD              | D21, D22   | XIAP                   |
| C7, C8     | Fas/TNFRSF6/CD95  | D23, D24   | PBS (Negative Control) |
| C9, C10    | HIF-1α            | E1, E2     | Reference Spots        |
| C11, C12   | HO-1/HMOX1/HSP32  |            |                        |

B

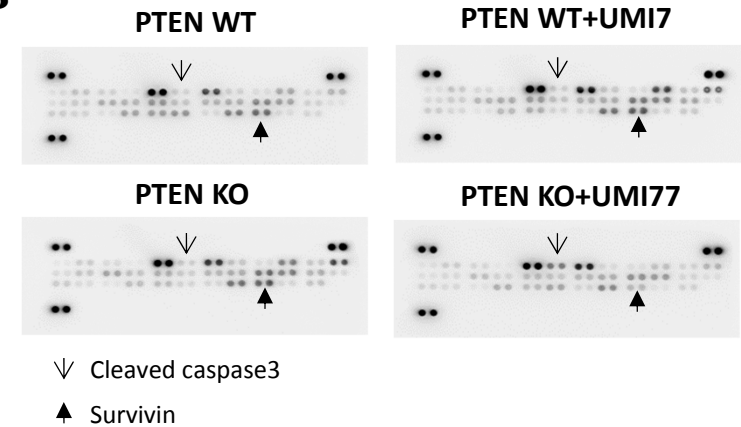

C

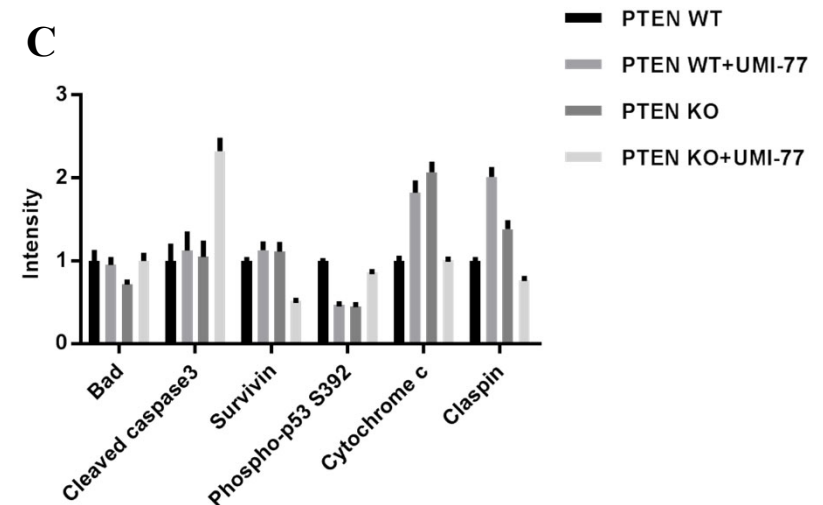

Supplemental Figure 2. Layout of apoptotic antibody array and results analysis. (A) The layout of 37 apoptosis associated antibodies in the apoptotic array. (B) Experimental results of immunoblots across four samples from PTEN WT±UMI-77 and PTEN KO±UMI-77 LN18 cells. Downward arrows and upward arrows indicated the positions of antibodies of cleaved caspase-3 and survivin (in duplicate), respectively. (C) Quantification of the expression levels of six apoptotic proteins that were significantly altered across four samples.

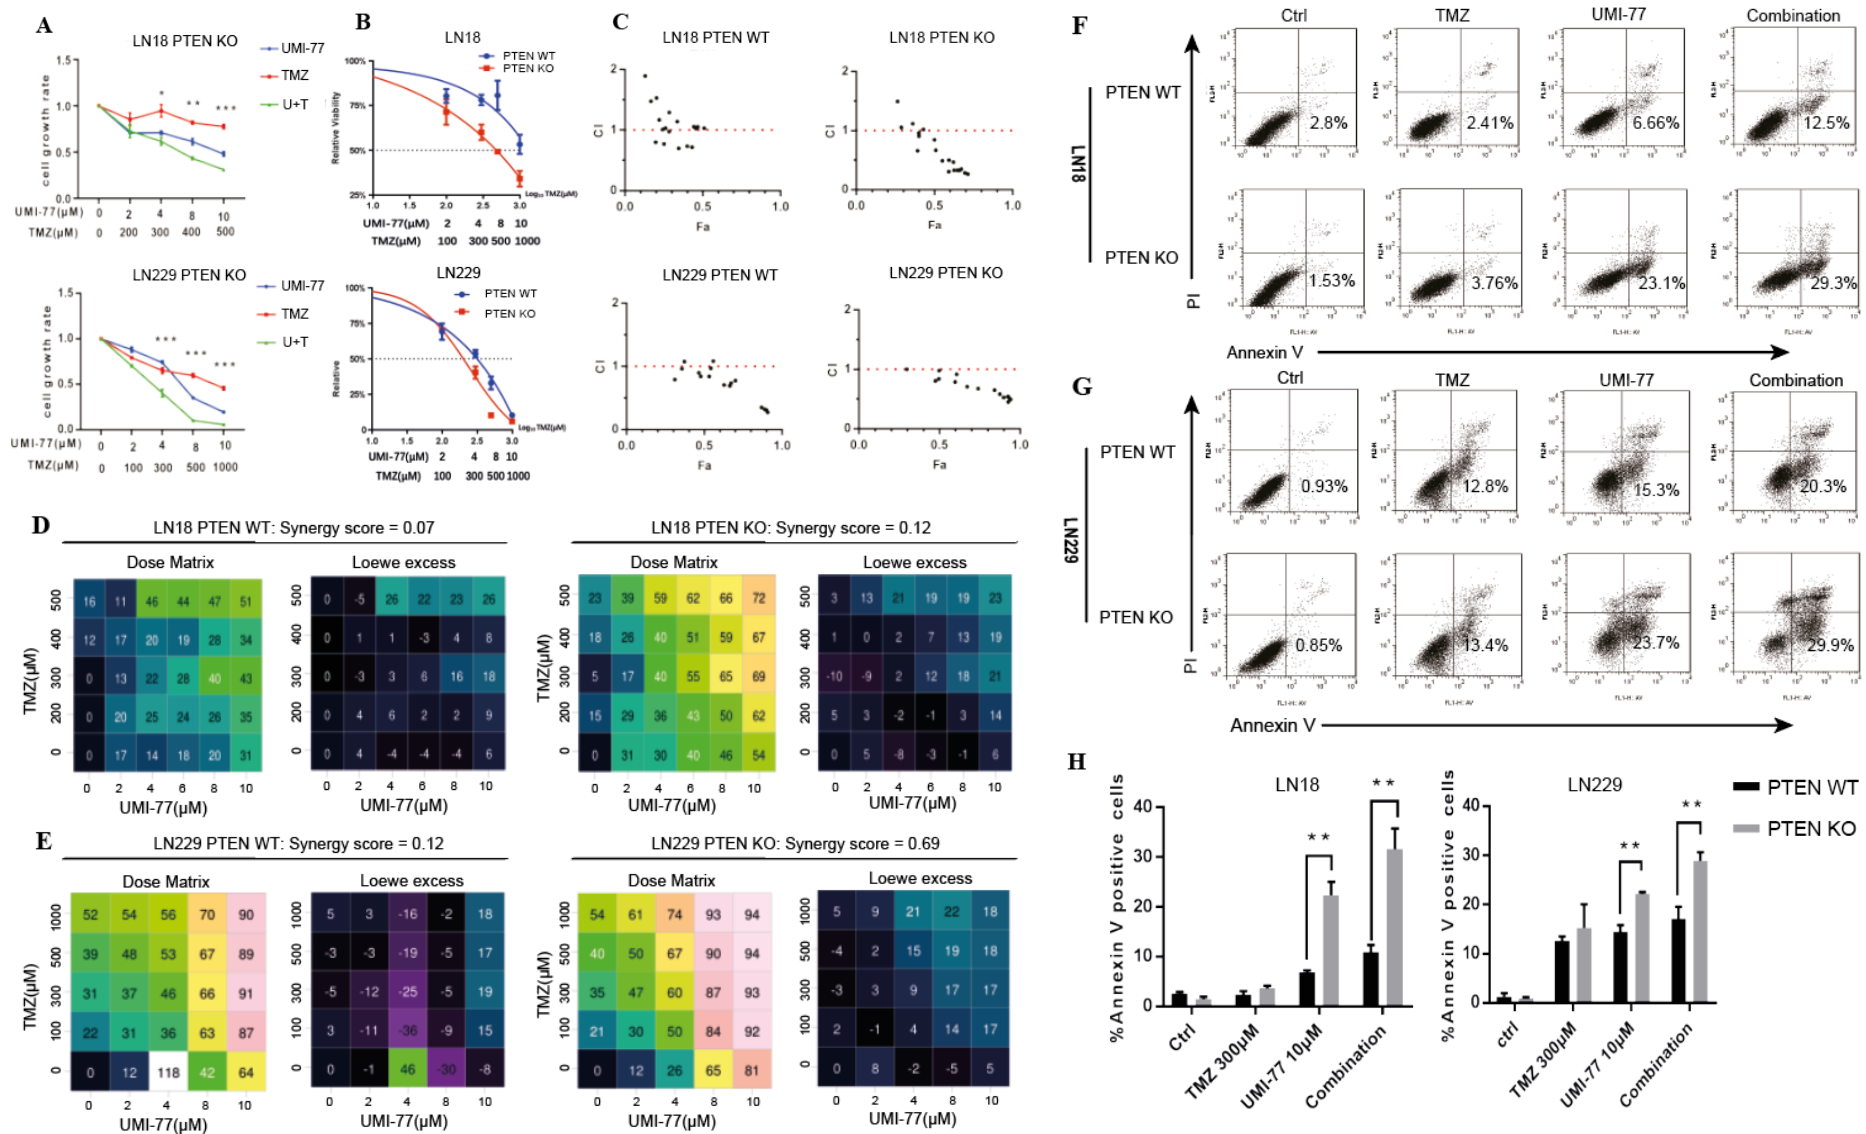

Supplemental Figure 3. Evaluation of the anti-GBM effect of the combined treatment of UMI-77 and temozolomide (U+T). (A) Inhibition of the proliferation of PTEN KO LN18 cells by UMI-77, temozolomide and U+T. (B) Comparison of the antiproliferation-proliferation fitting curves of U+T between PTEN WT and KO cells. (C) Isobologram and combination index analysis of the proliferation inhibition in PTEN WT/KO LN18 and LN229 cells treated with the U+T. CI < 1 indicates a synergistic effect. (D-E) Growth Inhibition values (left matrix), and Loewe eExcess values (right matrix) of PTEN WT/KO LN18 and LN229 cells that received U+T at different concentrations. Synergy score (top) > 0 indicates a synergistic effect. (F-G) Flow cytometry analysis of apoptotic cells of PTEN WT/KO LN18 and LN229 cells that received no treatment, temozolomide, UMI-77, and U+T. (H) Quantification of the apoptotic fraction of cells in each sample.

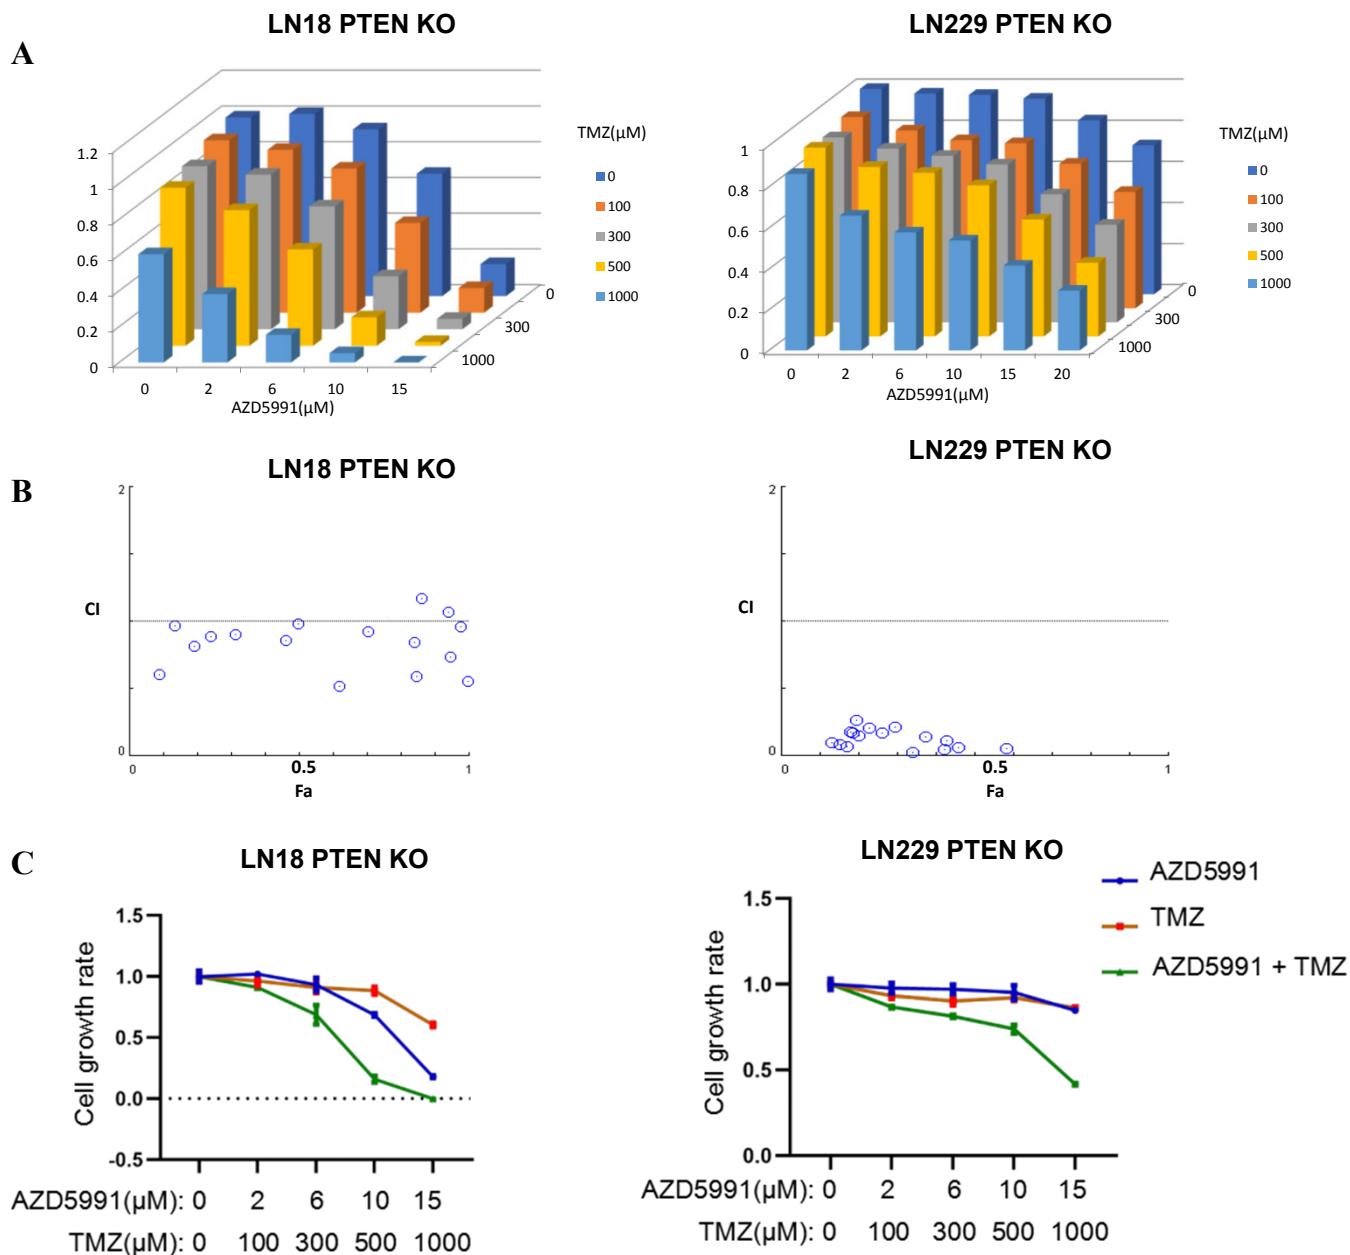

Supplemental Figure 4. Combination treatment of temozolomide (TMZ) and a second generation MCL1 selective inhibitor AZD5991 in PTEN KO GBM cell lines. (A) Evaluation of the anti-proliferation effects of combination of temozolomide and AZD5991 in LN18 and LN229 cell lines. (B) Isobologram and combination index analysis of the proliferation inhibition in PTEN KO LN18 and LN229 cells treated with the TMZ and AZD5991.  $CI < 1$  indicates a synergistic effect. (C) Growth inhibition curves of PTEN KO LN18 and LN229 cells received TMZ and AZD5991 combination treatment.

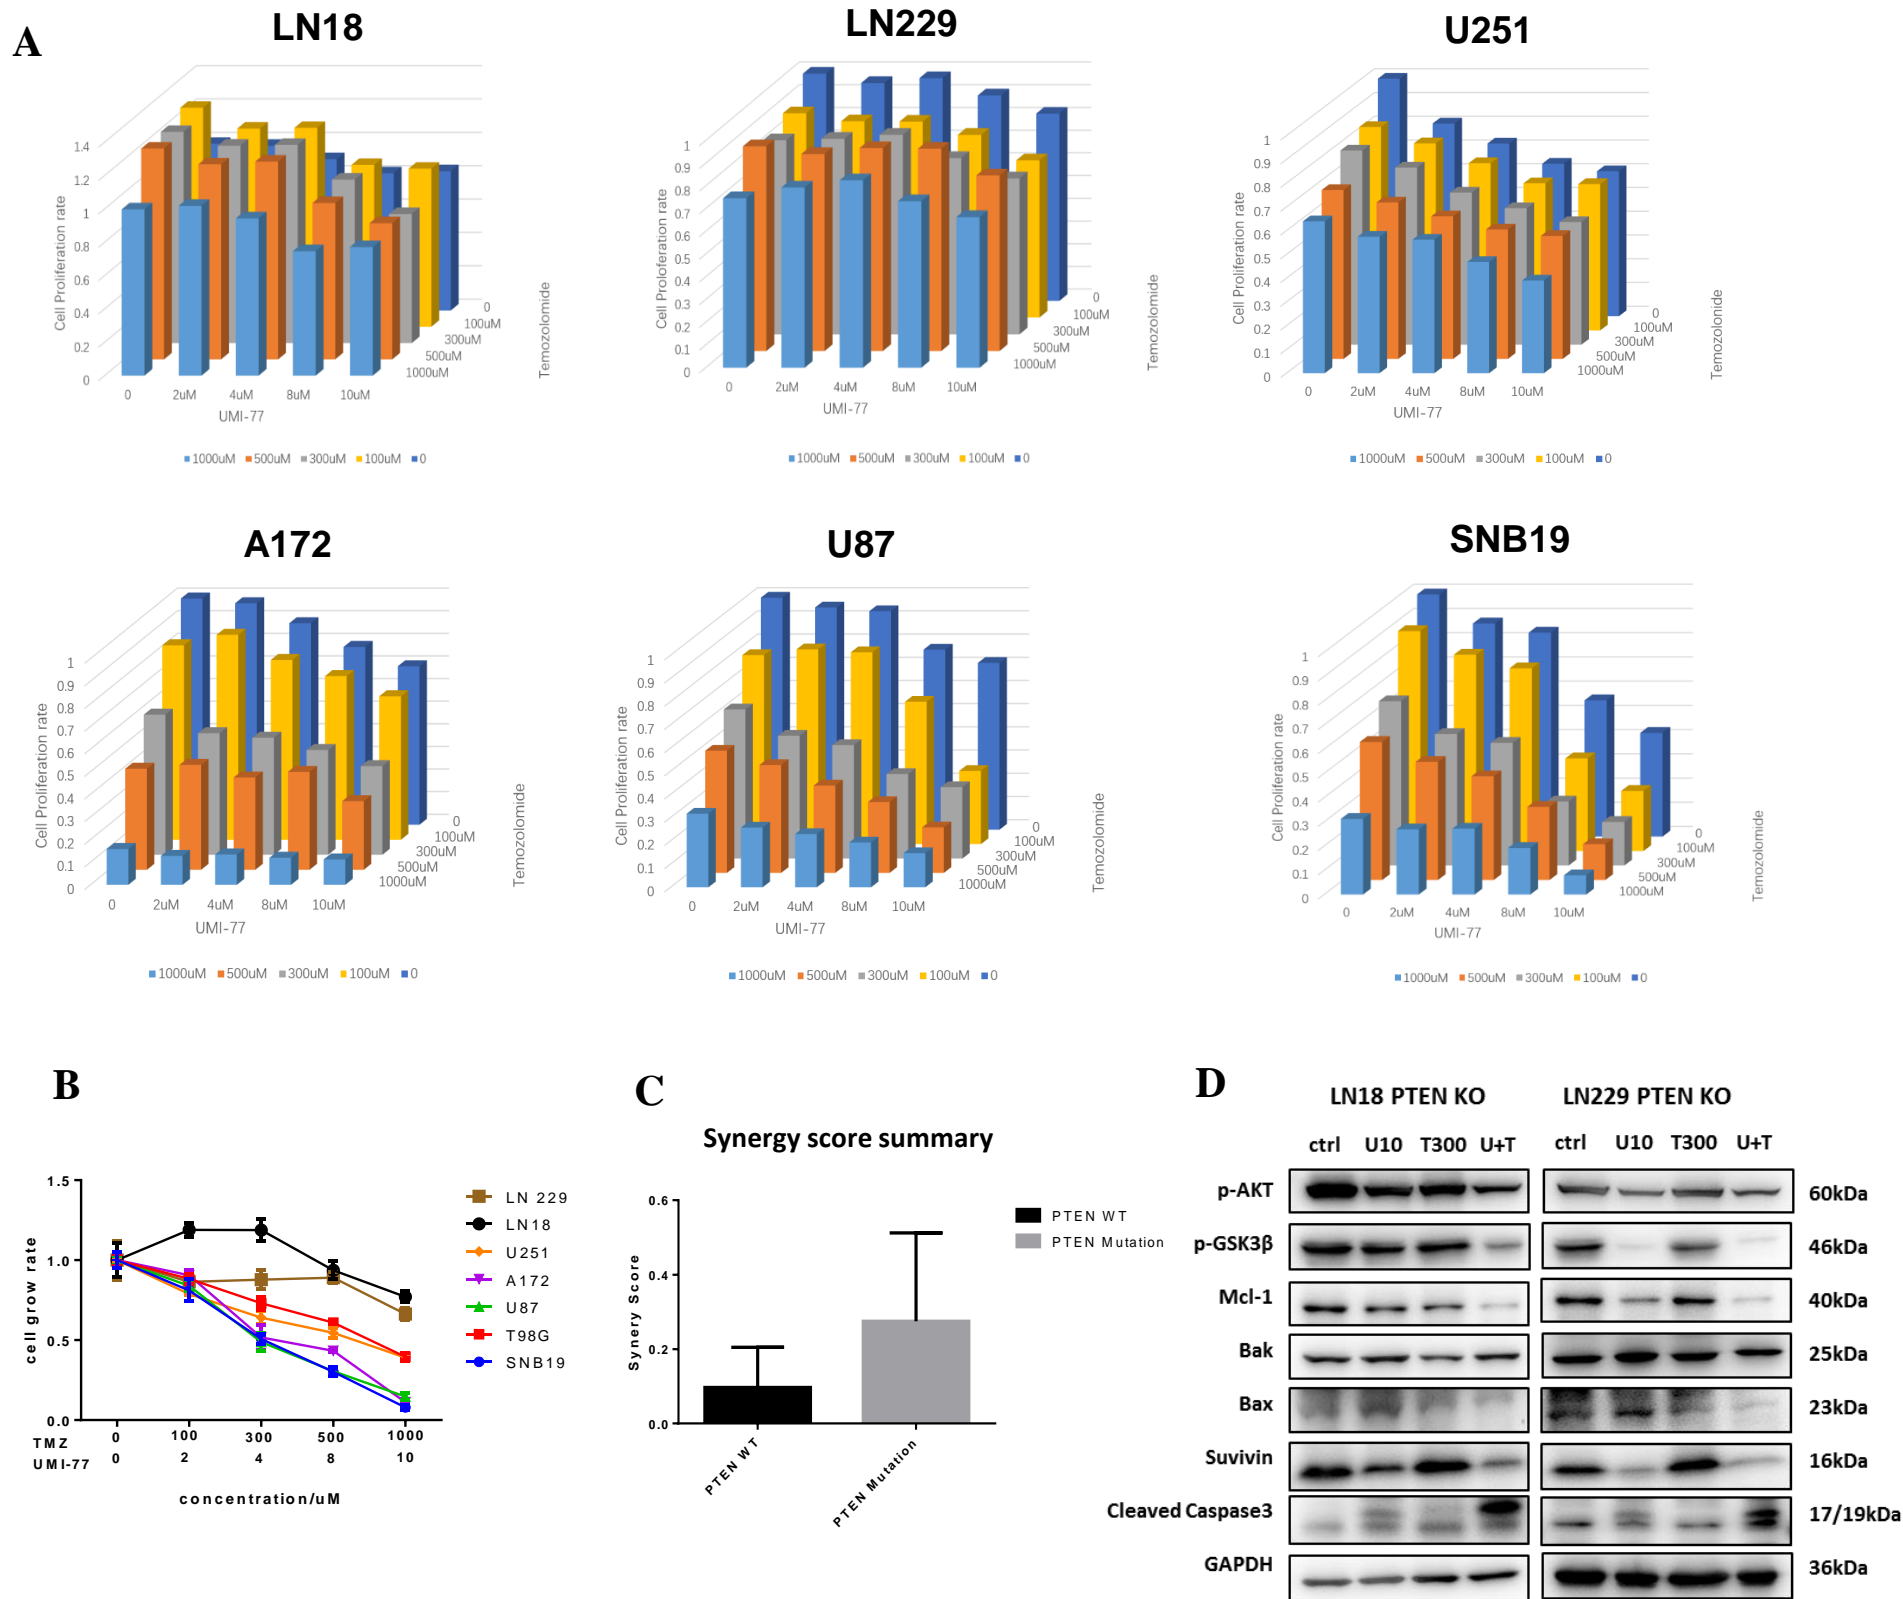

Supplemental Figure 4. Combination treatment of temozolomide and UMI-77 in established GBM cell lines. (A) Evaluation of the anti-proliferation effects of combination of temozolomide and UMI-77 in all GBM cell lines. (B) Growth inhibition curves of GBM cell lines received TMZ and UMI-77 combination treatment. (C) Mean of the synergy scores calculated by Horizon's proprietary Chalice™ software between PTEN WT and PTEN mutated GBM cell lines. (D) Immunoblots of PI3K pathway and apoptosis associated proteins in PTEN KO LN18 and LN229 cells that received no treatment, UMI-77 (10  $\mu$ M), temozolomide (300  $\mu$ M) or a combination of both.
